# Supplementary material for: Correlation between sequence divergence and polymorphism reveals similar evolutionary mechanisms acting across multiple timescales in a rapidly evolving plastid genome
Source: BMC Evol Biol. 2014 Dec 24;14:1. doi: 10.1186/s12862-014-0268-y (PMC4300152; doi:10.1186/s12862-014-0268-y)
Supplement: Additional file 1: — Sequence of clpP for Trachelium caeruleum with re-annotated intron/exon boundaries. Exons in capital letters and introns in lowercase. [file 12862_2014_268_MOESM1_ESM.pdf]

**Additional file 1.pdf: Sequence of *clpP* for *Trachelium caeruleum* with re-annotated intron/exon boundaries.** Exons in capital letters and introns in lowercase.

ATGCCAGTTGGTGTTCGAAAGTCCCACCTATGCCACTTGAACCTGAATCTGAAAA  
AAATCAGAAAAAGAAACCTAAACAAGGATTCCTCGAAAAATCCCTCAAATTCCACAA  
AAGCCTAGCACGAGAAAAAGAATTCATAGACGAAGAAGAAGTAGATGAAGAAGAAG  
TAGATGAAGAAGAAGTAGATGAAGTATATGAAGTATATGAAGAAGAAGTAGAAAAAG  
TAGAAACAAAAAAAAGGAAAAAGACGGAGAAGAAGAGGAGGAACAAGAGGAGGA  
AGAGGAACCTTGGGTTGACTTATAgTgcgactgtcagatatattggctcatatgggatttccccgttctctccc  
cgattgagagatcctctatttcgccaagaaagattaattgaatcatccaaaatttggagcgtgaagtccaattagatacattt  
ttaggggcatcaaattactattagccgttcgaataatttatggttggcttggtggacgaataaattgaagtatccaggctccgt  
tataaaaaaccaattggtaattctatctaccattactccttatataaacggattcctagttagaagaaattctatttgtaaata  
gaaatgatctgaaactgttctgttaataatcgagtaatatgcatgaagacctggaatatttggcgaatgctgaattgaga  
aaaaagaagtggtaattgggagatttgttctatatgtgcaaataaaaagcgggtggatcttaccggagtagagtataaac  
ctaaaaagattcagattaacgaggtccatttaggaacaagcaaatgacatcgtgatttgaattggatctcgatgaaagacta  
tatcaatgaaaagtgaattcgataagtttcattaattcttactcgtctttattgaaaatcgaatcaaatgagaagtcgaaag  
agcattctatgaaatccgaaaggggattggaatctatacattgatttttgcgaataatttgaaccgtatgctgcaaaaggc  
gcctgtacggttcctaaggaatagaatttgaccctaataCGAACGACTTTATCGAGACAGAGCACTTTTT  
TTATTCAAAGAGCTGGATAAGGAGCTCGCGAATACACTTGTGGGTCTTATGGTATTT  
CTCAATATAGAGGATAATACCAAAGAACAATTTTTATTTATCAACTCTCCTGGTGGAT  
CACTAGTGTATGGAATATCTGTGCATGATGTTAGCCGACTGGTGCGACCAGATGTA  
CATACACTAGGCATGGGAGTAGCCGCTTCAATGGCCGCTTTCATCCTGTCCGGAG  
GAGCACAAACCAAACGTCTAGCATTCCCTCACGTTTggcgccaatgagggtttatttcagagaaaaa  
agaagactatgccttcgcatatgaaatatgaatagtaagtaataataagtaataatagcatggcactttgaattcgatatatga  
aagtttttgattgtttttcaaagcattagattatgtatcgagagagtagtatgagataaaaggattttatgattttcttatctatcgg  
gagtcaggttcagcgtcacaaactttttgcttcccaccggagatctagtaacaataatttatgttatgaacgagtgaaaaaa  
aaaaaaaaaaaaaagattcttttcccttagtttatttaataaaaaaagcaacttgggattgcttaatcatagacaaaaa  
aagaaatccatatataaagcaacggagccatcatagtagtttgaactcccacgaaaggaagggtggaatttgatcattta  
ctgatcgagggtcaatagatcctattttatcttctttgatagagggttaaggatcaatttgattgtagagccgtatgcaatgcaca  
aaagatgcctgtacggtgttcaattctatcttttcttcttattctttatcttcttcttcttcttcccttatcaggcgaactagaaga  
acctttattatatcatcAGGGTAATGATTCATCAACCAAAATGTGTTTTTGCAAAGAATCGCAT  
CCCGATTGACGTAGGCCTGGACGGAGAAGAAGTGACAAAATTACGTAACCTACGTCA  
TAGGACATTATGCACAAAGATCGCGCAGGTCTATAGCGATGGTAGTCGCCGACCTG  
AAAAGACATACTTATATGACACCAACAGAGGCCCGAACTTATGGAATTGTTGATTCT  
ATAGCGGCTGACTGGGAGGTCTACTAAATCCATGATTTGA
